# Supplementary material
Source: MDPI journal article supplement (https://www.mdpi.com/2073-4344/11/7/843)
Supplement: s1 [file s1]

# **Supplementary Materials: Effect of Textural Properties and Presence of Co-Cation on NH<sub>3</sub>-SCR Activity of Cu-Exchanged ZSM-5**

Magdalena Jabłońska, Kinga Góra-Marek, Miha Grilc, Paolo Cleto Bruzzese, David Poppitz, Kamila Pyra, Michael Liebau, Andreas Pöpl, Blaž Likozar, Roger Gläser

**Table S1.** Calculated parameters for adsorption and desorption kinetics.

|                              | $r_j^{\text{ads}}$                                    |                                              | $r_{\text{NO}}^{\text{des}}$                              |                                                    | $r_{\text{NH}_3}^{\text{des}}$                            |                                                    |
|------------------------------|-------------------------------------------------------|----------------------------------------------|-----------------------------------------------------------|----------------------------------------------------|-----------------------------------------------------------|----------------------------------------------------|
|                              | $k_j^{\text{ads}} \cdot C_j \cdot \theta_{\text{VS}}$ |                                              | $k_{\text{NO}_x}^{\text{des}} \cdot \theta_{\text{NO}_x}$ |                                                    | $k_{\text{NH}_3}^{\text{des}} \cdot \theta_{\text{NH}_3}$ |                                                    |
|                              | $k_{\text{NO}_x}^{\text{ads}}/\text{s}^{-1}$          | $k_{\text{NH}_3}^{\text{ads}}/\text{s}^{-1}$ | $k_{\text{NO}_x}^{\text{des}}/\text{s}^{-1}$              | $Ea_{\text{NO}_x}^{\text{des}}/\text{kJ mol}^{-1}$ | $k_{\text{NH}_3}^{\text{des}}/\text{s}^{-1}$              | $Ea_{\text{NH}_3}^{\text{des}}/\text{kJ mol}^{-1}$ |
| <b>H-ZSM-5</b>               | $(2.0 \pm 0.3) \times 10^3$                           | $(5.8 \pm 0.5) \times 10^3$                  | $(1.9 \pm 0.2) \times 10^{-2}$                            | $37 \pm 2$                                         | $(1.7 \pm 0.3) \times 10^{-2}$                            | $29 \pm 3$                                         |
| <b>Cu-ZSM-5</b>              | $(2.0 \pm 0.3) \times 10^3$                           | $(2.9 \pm 0.5) \times 10^3$                  | $(7.6 \pm 0.4) \times 10^{-3}$                            | $84 \pm 4$                                         | $(1.7 \pm 0.3) \times 10^{-3}$                            | $16 \pm 3$                                         |
| <b>Na-Cu-ZSM-5</b>           | $(2.0 \pm 0.3) \times 10^3$                           | $(3.7 \pm 0.5) \times 10^3$                  | $(6.6 \pm 0.3) \times 10^{-3}$                            | $109 \pm 3$                                        | $(2.5 \pm 0.3) \times 10^{-3}$                            | $16 \pm 3$                                         |
| <b>Cu-ZSM-5 (NaOH)</b>       | $(2.0 \pm 0.3) \times 10^3$                           | $(1.5 \pm 0.5) \times 10^3$                  | $(3.9 \pm 0.1) \times 10^{-3}$                            | $45 \pm 3$                                         | $(5.7 \pm 0.3) \times 10^{-3}$                            | $24 \pm 3$                                         |
| <b>Cu-ZSM-5 (TPAOH)</b>      | $(2.0 \pm 0.3) \times 10^3$                           | $(2.2 \pm 0.5) \times 10^3$                  | $(5.36 \pm 0.01) \times 10^{-2}$                          | $47.5 \pm 0.2$                                     | $(2.6 \pm 0.3) \times 10^{-3}$                            | $23 \pm 3$                                         |
| <b>Cu-ZSM-5 (NaOH/TPAOH)</b> | $(2.0 \pm 0.3) \times 10^3$                           | $(1.3 \pm 0.5) \times 10^3$                  | $(1.6 \pm 0.1) \times 10^{-2}$                            | $42 \pm 1$                                         | $(1.4 \pm 0.3) \times 10^{-3}$                            | $20 \pm 1$                                         |

\* All rate constants are reported at the temperature of 150 °C. \*\* Temperature influence on the adsorption rate constants was considered negligible.

**Table S2.** Preparation procedures applied for modifications of parent ZSM-5.

| Samples               | Preparation procedure                                                                                                                                                                                                  |
|-----------------------|------------------------------------------------------------------------------------------------------------------------------------------------------------------------------------------------------------------------|
| H-ZSM-5               | 1) Calcination of $\text{NH}_4^+$ -ZSM-5 (550 °C, 4 h, 1 K min <sup>-1</sup> ).                                                                                                                                        |
| Cu-ZSM-5              | 1) Modification of H-ZSM-5 with an aqueous solution of copper precursor (0.05 M, 24 h, RT).                                                                                                                            |
| Cu-ZSM-5 (NaOH)       | 1) Modification of $\text{NH}_4^+$ -ZSM-5 with an aqueous solution of 0.2 M NaOH, TPAOH or mixture of NaOH and TPAOH (65 °C, 2 h under reflux);                                                                        |
| Cu-ZSM-5 (TPAOH)      | 2) A triple ion-exchange with 0.5 M $\text{NH}_4\text{NO}_3$ (60 °C, 1 h) in case of $\text{NH}_4^+$ -ZSM-5 treated with NaOH and NaOH/TPAOH; calcination of obtained materials (550 °C, 4 h, 1 K min <sup>-1</sup> ); |
| Cu-ZSM-5 (NaOH/TPAOH) | 3) Modification of H-ZSM-5 with an aqueous solution of copper precursor (0.05 M).                                                                                                                                      |
| Na-Cu-ZSM-5           | 1) Modification of H-ZSM-5 with an aqueous solution of co-cation precursor (0.05 M, 80 °C, 2 h);<br>2) Modification of Na-ZSM-5 with an aqueous solution of copper precursor (0.05 M, 24 h, RT).                       |

**Table S3.** Relevant parameters for kinetic modelling.

| Property                                 | Symbol           | Value                        |
|------------------------------------------|------------------|------------------------------|
| Bed length                               | $Z$              | 8.6 mm *                     |
| Bed porosity                             | $\alpha$         | 0.29                         |
| Catalyst mass                            | $m_{\text{cat}}$ | 200 mg **                    |
| Volumetric velocity                      | $\dot{V}$        | 120 ml min <sup>-1</sup> *** |
| Temperature of the mass flow controllers | $T_{\text{MFC}}$ | 293 K                        |

\*4.3 mm for TPD-NO<sub>x</sub> tests; \*\*100 mg for TPD-NO<sub>x</sub> tests; \*\*\*50 ml min<sup>-1</sup> for TPD-NO<sub>x</sub> tests

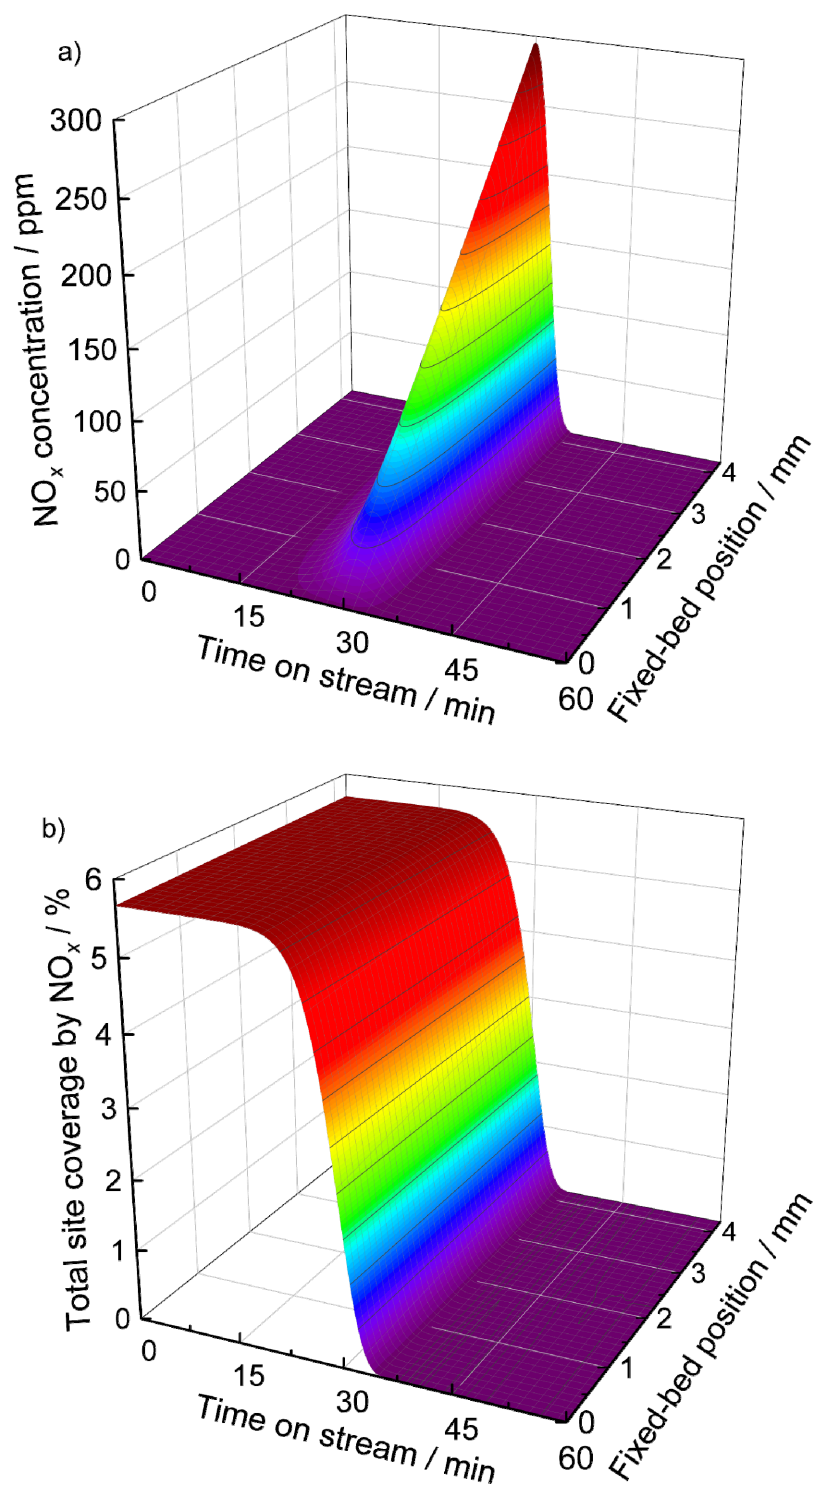

**Figure S1.** (a) NO concentration in the gas phase and (b) NO surface coverage as a function of time on stream and position in the reactor during the TPD-NO<sub>x</sub> at 150 °C over Na-Cu-ZSM-5 conversion (conditions: 0.1 g of catalyst, 50 mL min<sup>-1</sup>, 0 ppm NO, heat-up rate 10 K min<sup>-1</sup>, initial temperature 50 °C).

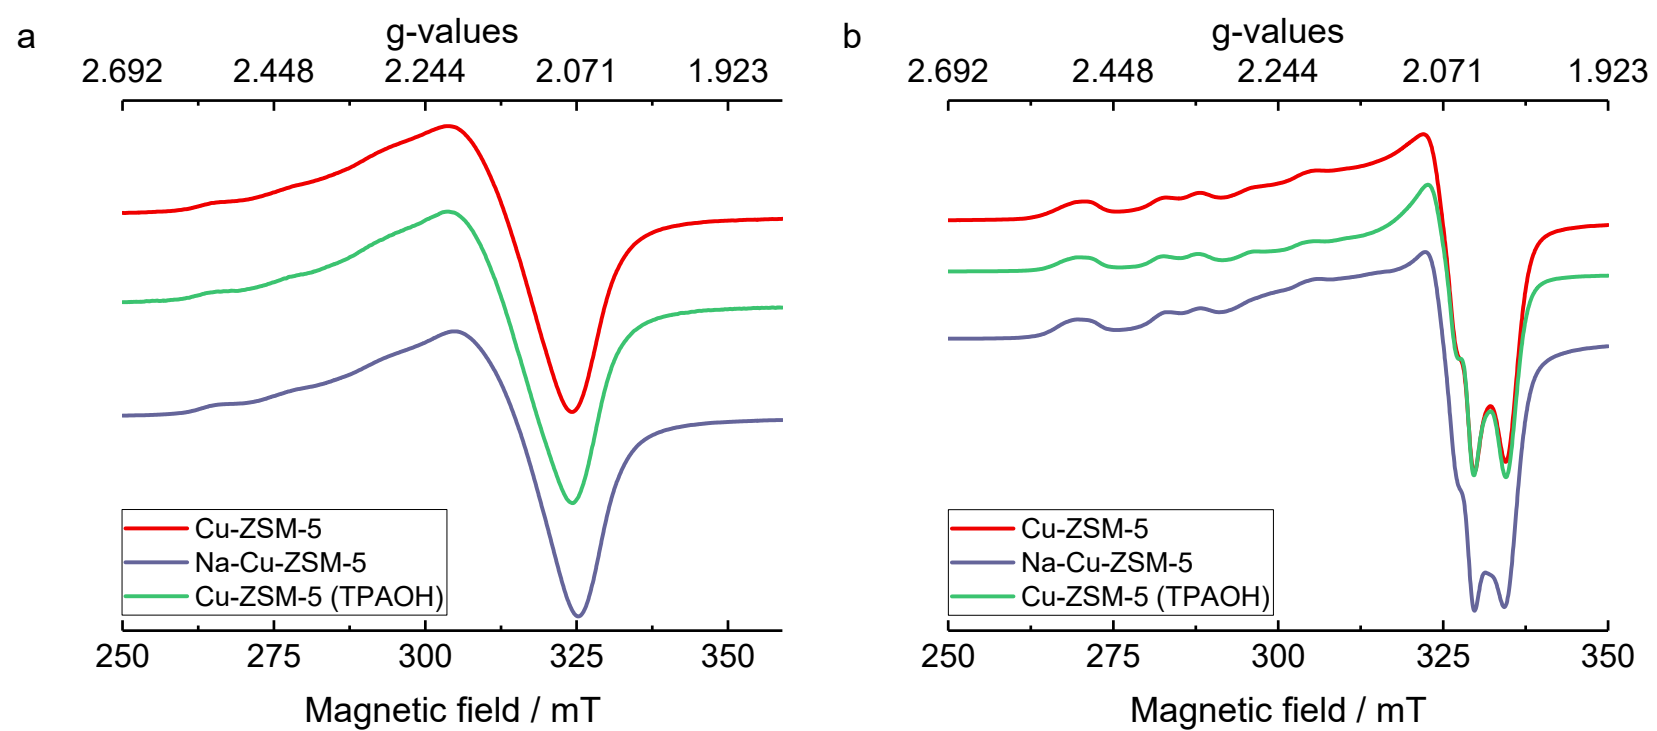

**Figure S2.** Experimental cw-EPR spectra of (a) hydrated and (b) dehydrated Cu-ZSM-5 acquired at room temperature.

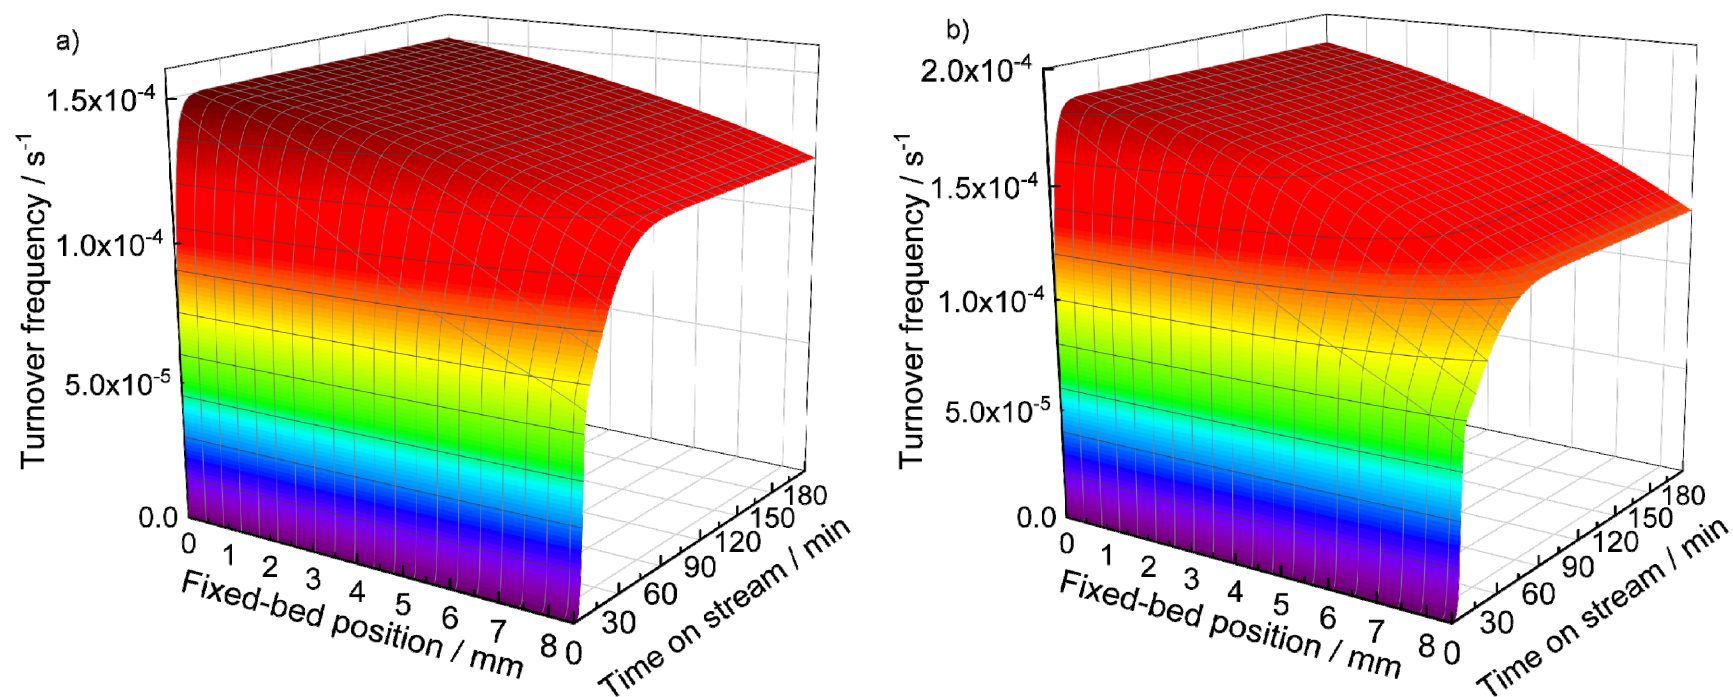

**Figure S3.** TOF<sub>1</sub> as a function of time on stream and position in the reactor for NH<sub>3</sub>-SCR at 150 °C over Cu-ZSM-5 conversion in (a) absence and (b) presence of 5 vol.-% H<sub>2</sub>O (conditions: 0.2 g of catalyst, 120 mL min<sup>-1</sup>, 500 ppm NO, 575 ppm NH<sub>3</sub>).
